# Supplementary material for: A chromosome-scale genome assembly of mungbean (Vigna radiata)
Source: PeerJ. 2024 Dec 23;12:e18771. doi: 10.7717/peerj.18771 (PMC11670757; doi:10.7717/peerj.18771)
Supplement: Supplemental Information 4 [file peerj-12-18771-s004.xlsx]

## Sheet: Table S1
Supplementary Table S1. Accession numbers and references for all species used in the comparative analysis.
Species	Accession numbers
Oryza sativa	GCF_034140825.1
Arabidopsis thaliana	GCF_000001735.4
Arachis duranensis	GCF_000817695.3
Cicer arietinum	GCF_000331145.1
Medicago truncatula	GCF_003473485.1
Glycine max	GCF_000004515.6
Phaseolus vulgaris	GCF_000499845.1
Vigna unguiculata	GCF_004118075.2
Vigna angularis	GCF_016808095.1
Vigna reflexo-pilosa	Pootakham et al., 2023
Vigna mungo	Pootakham et al., 2020
VC1973A v2	Ha et al., 2021
VradJL7	Liu et al., 2022
KUML4	This study
Cucumis sativus	GCF_000004075.3
Cucumis melo	GCF_025177605.1
Citrullus lanatus	Yu et al. (2023) CuGenDBv2: An updated database for cucurbit genomics. Nucleic Acids Research 51, D1457-D1464
	Watermelon (97103) genome v2
