# Supplementary material for: A chromosome-scale genome assembly of mungbean (Vigna radiata)
Source: PeerJ. 2024 Dec 23;12:e18771. doi: 10.7717/peerj.18771 (PMC11670757; doi:10.7717/peerj.18771)
Supplement: Supplemental Information 5 [file peerj-12-18771-s005.xlsx]

## Sheet: Table S2
Supplementary Table S2. Assembly statistics of V. radiata KUML4 genome.
	stLFR sequencing	stLFR sequencing + HiC
N50 contig/scaffold size (bases)	4637384	40745975
L50 contig/scaffold number	30	5
N75 contig/scaffold size (bases)	2100087	32444348
L75 contig/scaffold number	65	8
N90 contig/scaffold size (bases)	717271	25472930
L90 contig/scaffold number	118	11
Assembly size (bases)	464021762	468083604
Number of scaffolds	6685	5834
Number of scaffolds ≥ 100 kb	181	35
Number of scaffolds ≥ 1 Mb	102	11
Number of scaffolds ≥ 10 Mb	6	11
Longest scaffold (bases)	17676809	70717373
N	14441930	14451670
GC content (%)	33.38	33.27
BUSCO evaluation (% completeness)	98.3	98.3
