# Supplementary material for: A chromosome-scale genome assembly of mungbean (Vigna radiata)
Source: PeerJ. 2024 Dec 23;12:e18771. doi: 10.7717/peerj.18771 (PMC11670757; doi:10.7717/peerj.18771)
Supplement: Supplemental Information 6 [file peerj-12-18771-s006.xlsx]

## Sheet: Table S3
Supplementary Table S3. Summary of sequencing data from stLFR and Hi-C platforms.
	stLFR	Hi-C
Total data (Gb)	121.48	50.32
Number of Bases	121482837432	50324006132
Number of Reads	501995196	336670178
GC (%)	38.28	35.47
Q20(%)	98.64	98.18
Q30(%)	95.55	94.26
Mapped Reads	501995196	308734192
N50 Read Length (bp)	100	150
Mean Reads Length (bp)	100	150
Coverage (X)	225.12	113.23
