# Supplementary material for: A chromosome-scale genome assembly of mungbean (Vigna radiata)
Source: PeerJ. 2024 Dec 23;12:e18771. doi: 10.7717/peerj.18771 (PMC11670757; doi:10.7717/peerj.18771)
Supplement: Supplemental Information 7 [file peerj-12-18771-s007.xlsx]

## Sheet: Table S4
Supplementary Table S4. Functional annotations of V. radiata KUML4 protein-coding genes.
Database	Number of genes annotated	percent of all predicted genes
NR	27667	96.7614
GO	18334	64.1206
Swissprot	20163	70.5173
EC	7779	27.206
KEGG	3062	10.7089
Total (predicted gene models)	28593
