# Supplementary material for: A chromosome-scale genome assembly of mungbean (Vigna radiata)
Source: PeerJ. 2024 Dec 23;12:e18771. doi: 10.7717/peerj.18771 (PMC11670757; doi:10.7717/peerj.18771)
Supplement: Supplemental Information 8 [file peerj-12-18771-s008.xlsx]

## Sheet: Table S5
Supplementary Table S5. Noncoding RNA in the V. radiata KUML4 genome.
Type	Number	Length (nt)	Mean length (nt)
rRNA	483	215937	447.07
microRNA	28017	2476502	88.39
snRNA	12497	915836	73.2845
snoRNA	12153	879093	72.34
splicing	765	36743	106.81
tRNA	765	57476	75.13
other ncRNA	14887	1186144	79.68
