# Supplementary material for: A chromosome-scale genome assembly of mungbean (Vigna radiata)
Source: PeerJ. 2024 Dec 23;12:e18771. doi: 10.7717/peerj.18771 (PMC11670757; doi:10.7717/peerj.18771)
Supplement: Supplemental Information 9 [file peerj-12-18771-s009.xlsx]

## Sheet: Table S6
Supplementary Table S6. List of significantly expanded or contracted gene families in V. radiata KUML4.
EXPANSION
ORTHOGROUPS	Functions
OG0000007	berberine bridge enzyme-like 13
OG0000036	isoflavone 2'-hydroxylase
OG0000082	cytokinin riboside 5'-monophosphate phosphoribohydrolase LOG7
OG0000109	aspartic proteinase CDR1-like
OG0000115	UDP-glycosyltransferase 73D1
OG0000178	ethylene-responsive transcription factor ERF098-like
OG0000321	cytochrome P450 71A1-like
OG0000413	uncharacterized protein LOC106755778
OG0000476	GDSL esterase/lipase EXL3
OG0000480	zeatin O-glucosyltransferase-like
OG0000626	CSC1-like protein HYP1
OG0000704	hypothetical protein LR48_Vigan08g060200
OG0000716	uncharacterized protein LOC106757252
OG0000842	protein RER1A isoform X2
OG0001169	serine/threonine-protein kinase AtPK2/AtPK19
OG0001627	syntaxin-71 isoform X2
OG0002147	40S ribosomal protein S16
OG0002168	uncharacterized protein LOC106770179 isoform X1
OG0002244	uncharacterized protein LOC106768326 isoform X2
OG0002343	protein P21
OG0002406	probable sugar phosphate/phosphate translocator At1g06470
OG0002571	egg cell-secreted protein 1.1
OG0002993	uncharacterized protein LOC108347853
OG0003063	uncharacterized protein LOC124841802
OG0003339	hypothetical protein PHAVU_008G079200g
OG0003417	transcription factor bHLH25 isoform X1
OG0003727	Acyl-CoA N-acyltransferase
OG0003793	uncharacterized protein LOC106766261
OG0004057	trihelix transcription factor ASIL2
OG0004126	hypothetical protein TSUD_27900
OG0004368	BUD13 homolog
OG0004999	protein saal1
OG0005240	putative methyltransferase-like protein 7A isoform X2
OG0005268	uncharacterized protein LOC106768073
OG0005434	hypothetical protein LR48_Vigan272s001800
OG0007638	spindle pole body component 110
OG0008269	hypothetical protein LR48_Vigan10g052600
OG0014535	hypothetical protein LR48_Vigan04g228000
OG0015763	uncharacterized protein HKW66_Vig0145810
CONTRACTION
ORTHOGROUPS	Functions
OG0000005	sugar transport protein 14-like
OG0000010	protein indeterminate-domain 2
OG0000014	MDIS1-interacting receptor like kinase
OG0000024	hypothetical protein LR48_Vigan818s003300
OG0000027	LOW QUALITY PROTEIN: probable serine/threonine-protein kinase PIX13
OG0000030	putative receptor-like protein kinase At3g47110
OG0000038	FT-interacting protein 1 isoform C
OG0000039	putative disease resistance protein RGA4
OG0000041	shaggy-related protein kinase epsilon isoform X1
OG0000046	proline-rich receptor-like protein kinase PERK4
OG0000047	protein NUCLEAR FUSION DEFECTIVE 6, mitochondrial isoform X2
OG0000048	sesquiterpene synthase
OG0000050	serine carboxypeptidase-like 18 isoform X5
OG0000052	probable LRR receptor-like serine/threonine-protein kinase At1g05700
OG0000053	putative disease resistance protein RGA3
OG0000054	rac-like GTP-binding protein ARAC8 isoform X2
OG0000055	MADS-box transcription factor 23-like
OG0000064	heavy metal-associated isoprenylated plant protein 39
OG0000065	G-type lectin S-receptor-like serine/threonine-protein kinase At4g27290
OG0000066	GDSL esterase/lipase At5g45910
OG0000068	UDP-glycosyltransferase 83A1
OG0000070	ABC transporter B family member 11
OG0000075	cytochrome P450 71A9
OG0000090	serine/threonine-protein phosphatase PP1
OG0000092	ADP-ribosylation factor A1B
OG0000093	cytosolic sulfotransferase 12-like
OG0000098	protein LATERAL ORGAN BOUNDARIES-like
OG0000106	amino acid permease 3-like
OG0000110	GDSL esterase/lipase At5g33370
OG0000114	germin-like protein subfamily 1 member 7
OG0000116	uncharacterized protein LOC106778382
OG0000117	uncharacterized protein LOC106753860 isoform X1
OG0000119	uncharacterized protein LOC106772814
OG0000126	short-chain dehydrogenase TIC 32, chloroplastic isoform X1
OG0000127	transcription factor RAX3
OG0000128	cysteine-rich receptor-like protein kinase 10
OG0000130	methanol O-anthraniloyltransferase-like
OG0000132	nucleobase-ascorbate transporter 6
OG0000133	cytochrome P450 CYP72A219 isoform X1
OG0000136	protein ZINC INDUCED FACILITATOR 1 isoform X1
OG0000139	polygalacturonase-like
OG0000147	probable mannitol dehydrogenase
OG0000148	kinesin-like protein KIN-7K, chloroplastic
OG0000150	probable serine/threonine-protein kinase PBL7
OG0000152	hypothetical protein LR48_Vigan11g163300
OG0000156	uncharacterized protein LOC113342675
OG0000162	probable inorganic phosphate transporter 1-3
OG0000163	uncharacterized protein LOC111241941
OG0000165	alkane hydroxylase MAH1-like
OG0000169	phospholipid-transporting ATPase 10-like
OG0000173	serine/threonine-protein kinase HT1-like isoform X1
OG0000176	probable pectate lyase 5
OG0000177	isoleucine N-monooxygenase 2-like
OG0000182	protein argonaute 10 isoform X1
OG0000184	WAT1-related protein At1g68170
OG0000187	chalcone synthase-like
OG0000191	PHD finger protein Alfin1 isoform X1
OG0000195	cyclic nucleotide-gated ion channel 1 isoform X1
OG0000198	protein FAM135B isoform X3
OG0000199	uncharacterized protein LOC106761407
OG0000202	protein SRG1
OG0000208	probable NOT transcription complex subunit VIP2 isoform X4
OG0000218	phosphoglycerate mutase-like protein 1 isoform X1
OG0000219	probable pectinesterase/pectinesterase inhibitor 33
OG0000225	disease resistance RPP13-like protein 4
OG0000227	acyl-protein thioesterase 2
OG0000228	SKP1-like protein 21 isoform X1
OG0000229	CTP synthase isoform X2
OG0000234	protein ALWAYS EARLY 3 isoform X2
OG0000235	S-adenosylmethionine synthase 1
OG0000245	lactoylglutathione lyase GLX1 isoform X1
OG0000247	serine/arginine-rich splicing factor SR34A isoform X1
OG0000249	protein LHY
OG0000260	hypothetical protein LR48_Vigan635s003600
OG0000263	uncharacterized protein LOC124826896
OG0000272	VAN3-binding protein
OG0000274	RNA-binding protein 39
OG0000283	dof zinc finger protein 1 isoform X1
OG0000285	alpha,alpha-trehalose-phosphate synthase [UDP-forming] 1
OG0000286	adenylyl-sulfate kinase 3 isoform X1
OG0000289	transcription factor PRE6
OG0000293	probable polygalacturonase
OG0000296	remorin
OG0000307	mitogen-activated protein kinase 20 isoform X1
OG0000314	caffeoylshikimate esterase-like
OG0000318	uncharacterized protein LOC106758998
OG0000320	NDR1/HIN1-like protein 10
OG0000324	homeobox protein knotted-1-like LET12 isoform X1
OG0000325	splicing factor U2af small subunit B
OG0000326	chromatin modification-related protein EAF1 B isoform X3
OG0000327	exportin-7-B isoform X2
OG0000343	protein trichome birefringence-like 14
OG0000344	ubiquitin carboxyl-terminal hydrolase 12 isoform X2
OG0000345	probable boron transporter 7
OG0000352	uncharacterized protein LOC106768048 isoform X3
OG0000360	uncharacterized protein LOC106773705 isoform X1
OG0000364	zinc finger CCCH domain-containing protein 48
OG0000367	uncharacterized protein LOC106777525
OG0000369	transcription factor bHLH112
OG0000377	ras-related protein RABE1a
OG0000380	dual specificity protein kinase zakA
OG0000382	AP2-like ethylene-responsive transcription factor ANT
OG0000390	common plant regulatory factor 1-like isoform X5
OG0000396	protein SHI RELATED SEQUENCE 1 isoform X1
OG0000397	nuclear poly(A) polymerase 4 isoform X5
OG0000398	transcription factor bHLH93
OG0000414	AUGMIN subunit 8 isoform X2
OG0000416	protein IQ-DOMAIN 1
OG0000419	probable alpha,alpha-trehalose-phosphate synthase [UDP-forming] 9
OG0000422	glycinol 4-dimethylallyltransferase-like
OG0000433	protein EMBRYO DEFECTIVE 1674
OG0000434	zinc finger BED domain-containing protein DAYSLEEPER
OG0000435	uncharacterized protein LOC106765602 isoform X1
OG0000437	Werner Syndrome-like exonuclease
OG0000441	F-box/kelch-repeat protein SKIP11-like
OG0000444	cell wall / vacuolar inhibitor of fructosidase 1
OG0000445	delta-1-pyrroline-5-carboxylate synthase
OG0000450	protein IQ-DOMAIN 14
OG0000452	endochitinase
OG0000455	probable E3 ubiquitin-protein ligase RHC1A
OG0000456	glucose-1-phosphate adenylyltransferase large subunit 1 isoform X1
OG0000457	protein WVD2-like 4 isoform X2
OG0000461	protein ENHANCED DOWNY MILDEW 2
OG0000491	myosin-6
OG0000501	probable receptor-like protein kinase At5g18500
OG0000502	polypyrimidine tract-binding protein homolog 1 isoform X2
OG0000503	probable serine/threonine-protein kinase WNK5
OG0000506	pectin acetylesterase 8-like isoform X1
OG0000508	kinesin-like protein KIN-14C
OG0000509	probable endo-1,3(4)-beta-glucanase ARB_01444
OG0000524	bifunctional dihydrofolate reductase-thymidylate synthase
OG0000525	growth-regulating factor 1 isoform X1
OG0000527	E3 ubiquitin-protein ligase RHF2A
OG0000528	putative protein TPRXL
OG0000529	homeobox-leucine zipper protein ATHB-13
OG0000532	probable amino acid permease 7 isoform X1
OG0000537	probable beta-1,3-galactosyltransferase 2
OG0000541	1-deoxy-D-xylulose-5-phosphate synthase, chloroplastic
OG0000551	serine/arginine-rich splicing factor RS40 isoform X1
OG0000552	ubinuclein-1 isoform X3
OG0000558	protein BASIC PENTACYSTEINE2-like
OG0000561	uncharacterized protein LOC106768376 isoform X4
OG0000563	DNA-directed RNA polymerase III subunit RPC6-like
OG0000564	lysine-specific demethylase JMJ25 isoform X2
OG0000566	uncharacterized protein LOC106757882
OG0000570	ureide permease 1
OG0000573	cyclic nucleotide-gated ion channel 18
OG0000587	LRR receptor-like serine/threonine-protein kinase ERL1 isoform X2
OG0000590	probable protein phosphatase 2C 60
OG0000592	probable inactive purple acid phosphatase 27
OG0000594	putative pectinesterase/pectinesterase inhibitor 28
OG0000595	ABC transporter C family member 10
OG0000603	transcription factor VOZ1-like
OG0000608	paired amphipathic helix protein Sin3-like 4 isoform X3
OG0000610	serine/threonine-protein kinase EDR1 isoform X2
OG0000611	polyadenylate-binding protein 2
OG0000630	LEAF RUST 10 DISEASE-RESISTANCE LOCUS RECEPTOR-LIKE PROTEIN KINASE-like 1.2 isoform X4
OG0000631	DNA-directed RNA polymerase 1B, mitochondrial
OG0000633	ABC transporter C family member 8
OG0000637	ubiquitin-conjugating enzyme E2 2
OG0000643	subtilisin-like protease SBT5.4
OG0000646	nuclear transcription factor Y subunit B-1
OG0000647	E3 SUMO-protein ligase SIZ1 isoform X5
OG0000648	uncharacterized protein LOC106774664 isoform X2
OG0000651	L-ascorbate oxidase homolog
OG0000656	protein UPSTREAM OF FLC
OG0000674	uncharacterized protein LOC106755415
OG0000676	ubiquitin-like domain-containing CTD phosphatase 1 isoform X1
OG0000681	salicylate carboxymethyltransferase
OG0000689	transcription initiation factor TFIID subunit 4b isoform X2
OG0000694	beta-galactosidase 15-like
OG0000700	NAC domain-containing protein 73
OG0000706	protein CELLULOSE SYNTHASE INTERACTIVE 1
OG0000710	hydroxyisourate hydrolase-like
OG0000717	sterol 3-beta-glucosyltransferase UGT80A2
OG0000721	Protein FAR1-RELATED SEQUENCE 8
OG0000731	protein RADIALIS-like 3
OG0000733	myosin-binding protein 1
OG0000735	hypothetical protein LR48_Vigan07g255100
OG0000738	sucrose-phosphatase 1 isoform X1
OG0000741	PH, RCC1 and FYVE domains-containing protein 1 isoform X1
OG0000742	ultraviolet-B receptor UVR8 isoform X3
OG0000753	17.3 kDa class II heat shock protein-like
OG0000754	uncharacterized protein LOC106768871 isoform X4
OG0000756	uncharacterized protein LOC106761076 isoform X1
OG0000766	ABSCISIC ACID-INSENSITIVE 5-like protein 5 isoform X3
OG0000769	protein MEI2-like 3
OG0000776	uncharacterized protein LOC106752572 isoform X1
OG0000783	protein PHOSPHATE STARVATION RESPONSE 1
OG0000786	heterogeneous nuclear ribonucleoprotein 1
OG0000797	transcriptional adapter ADA2b isoform X2
OG0000800	RNA polymerase II C-terminal domain phosphatase-like 4 isoform X2
OG0000804	MADS-box transcription factor 1 isoform X3
OG0000809	mitochondrial substrate carrier family protein B
OG0000812	auxin-induced protein 22E
OG0000815	formin-like protein 20 isoform X2
OG0000830	vacuolar cation/proton exchanger 3
OG0000838	probable alpha-amylase 2
OG0000840	glutathione S-transferase zeta class
OG0000866	protein ECERIFERUM 1-like
OG0000877	chitin elicitor receptor kinase 1 isoform X1
OG0000878	methylecgonone reductase-like
OG0000886	serine/threonine-protein kinase STY8 isoform X1
OG0000890	ARF guanine-nucleotide exchange factor GNOM isoform X1
OG0000891	lysine-specific demethylase JMJ18-like
OG0000893	transcription factor GTE1 isoform X4
OG0000896	uncharacterized protein LOC106773595
OG0000898	telomere repeat-binding protein 5 isoform X1
OG0000901	subtilisin-like protease SBT2.6
OG0000916	uncharacterized protein LOC106759284
OG0000917	transcription factor MYB65
OG0000920	kinesin-like protein KIN-UB
OG0000922	helicase SEN1
OG0000927	zinc finger CCCH domain-containing protein 18 isoform X2
OG0000930	cycloartenol synthase
OG0000943	CLP protease regulatory subunit CLPX3, mitochondrial
OG0000965	transcriptional corepressor LEUNIG isoform X1
OG0000974	probable CCR4-associated factor 1 homolog 9
OG0000980	uncharacterized protein LOC106770737
OG0000986	post-GPI attachment to proteins factor 3 isoform X1
OG0000990	pentatricopeptide repeat-containing protein At1g80270, mitochondrial
OG0000992	uncharacterized protein LOC106760510
OG0000994	casein kinase 1-like protein 3
OG0000999	protein NSP-INTERACTING KINASE 1
OG0001007	uncharacterized protein LOC106777732
OG0001012	U-box domain-containing protein 33 isoform X2
OG0001020	hexokinase-1
OG0001028	dehydrodolichyl diphosphate synthase 6 isoform X2
OG0001051	oxysterol-binding protein-related protein 1B-like
OG0001053	protein NRT1/ PTR FAMILY 4.6
OG0001057	trifunctional UDP-glucose 4,6-dehydratase/UDP-4-keto-6-deoxy-D-glucose 3,5-epimerase/UDP-4-keto-L-rhamnose-reductase RHM1
OG0001060	mediator of RNA polymerase II transcription subunit 1
OG0001061	nucleoside hydrolase 3 isoform X1
OG0001067	transcription factor DIVARICATA
OG0001070	glutathione S-transferase L3
OG0001073	hydroxyproline O-arabinosyltransferase 3
OG0001076	haloacid dehalogenase-like hydrolase domain-containing protein Sgpp isoform X2
OG0001078	uncharacterized protein LOC106777360 isoform X1
OG0001086	UDP-glucuronate:xylan alpha-glucuronosyltransferase 1
OG0001091	random slug protein 5
OG0001094	U6 snRNA phosphodiesterase isoform X1
OG0001097	uncharacterized protein LOC106778591
OG0001098	uncharacterized protein LOC124846764 isoform X2
OG0001105	BTB/POZ domain-containing protein At1g04390 isoform X2
OG0001138	probable low-specificity L-threonine aldolase 1
OG0001146	UDP-arabinose 4-epimerase 1
OG0001148	DNA-directed RNA polymerase III subunit RPC9
OG0001150	serine/threonine-protein kinase Aurora-3 isoform X2
OG0001160	heptahelical transmembrane protein 4
OG0001175	uncharacterized protein LOC106753684 isoform X1
OG0001180	myosin-binding protein 2
OG0001188	zinc finger A20 and AN1 domain-containing stress-associated protein 8
OG0001189	uncharacterized protein LOC106772614
OG0001197	sucrose synthase 7-like
OG0001200	CBL-interacting serine/threonine-protein kinase 1 isoform X1
OG0001205	uncharacterized protein LOC106779824 isoform X1
OG0001206	phosphatidylinositol N-acetylglucosaminyltransferase subunit A isoform X2
OG0001231	B-box zinc finger protein 18 isoform X3
OG0001235	protein SABRE isoform X2
OG0001246	protein phosphatase inhibitor 2
OG0001252	ATP citrate
OG0001254	uncharacterized protein LOC106771645
OG0001264	bifunctional 3-dehydroquinate dehydratase/shikimate dehydrogenase, chloroplastic isoform X3
OG0001277	ethylene-responsive transcription factor RAP2-2-like
OG0001282	AP2-like ethylene-responsive transcription factor At1g16060
OG0001296	DNA polymerase I A, chloroplastic/mitochondrial
OG0001302	probable WRKY transcription factor 4 isoform X2
OG0001304	mediator of RNA polymerase II transcription subunit 15a isoform X1
OG0001308	probable sugar phosphate/phosphate translocator At3g17430
OG0001313	coiled-coil domain-containing protein SCD2 isoform X2
OG0001316	uncharacterized protein LOC106757794 isoform X2
OG0001326	40S ribosomal protein S6
OG0001329	uncharacterized protein At3g28850-like
OG0001338	phosphatidylinositol/phosphatidylcholine transfer protein SFH3 isoform X1
OG0001345	uncharacterized protein LOC106761121 isoform X2
OG0001351	hypothetical protein DEO72_LG9g1928
OG0001362	protein KINESIN LIGHT CHAIN-RELATED 2 isoform X2
OG0001366	membrane-anchored ubiquitin-fold protein 3
OG0001370	uncharacterized protein LOC106769425
OG0001371	hypothetical protein LR48_Vigan04g203200
OG0001376	patatin-like protein 2
OG0001378	polycomb group protein FERTILIZATION-INDEPENDENT ENDOSPERM isoform X2
OG0001381	uncharacterized protein LOC106774217
OG0001399	uncharacterized protein LOC106780228
OG0001401	WD repeat-containing protein 26
OG0001403	phytochrome A isoform X1
OG0001406	L-type lectin-domain containing receptor kinase VIII.2
OG0001407	putative E3 ubiquitin-protein ligase RING1a isoform X1
OG0001410	probable mediator of RNA polymerase II transcription subunit 26b
OG0001412	probable S-adenosylmethionine carrier 2, chloroplastic
OG0001414	putative inactive cadmium/zinc-transporting ATPase HMA3
OG0001415	polyadenylation and cleavage factor homolog 4 isoform X3
OG0001422	mediator of RNA polymerase II transcription subunit 12
OG0001427	uncharacterized protein LOC106755855
OG0001429	protein NPGR2 isoform X1
OG0001432	lysine-specific demethylase JMJ706 isoform X1
OG0001435	probable methyltransferase PMT11
OG0001441	uncharacterized protein LOC108330529
OG0001470	sterol 3-beta-glucosyltransferase UGT80B1
OG0001483	SOSS complex subunit B homolog
OG0001487	nitrate regulatory gene2 protein
OG0001488	protein WVD2-like 4 isoform X1
OG0001494	uncharacterized protein LOC106768334 isoform X1
OG0001495	ENHANCER OF AG-4 protein 2
OG0001509	serine/threonine-protein kinase/endoribonuclease IRE1a
OG0001526	uncharacterized protein LOC106765256
OG0001543	uncharacterized protein LOC106758860
OG0001546	protein DETOXIFICATION 42
OG0001556	putative 4-hydroxy-4-methyl-2-oxoglutarate aldolase 2
OG0001561	uncharacterized protein LOC106764963
OG0001563	bZIP transcription factor 16 isoform X1
OG0001567	protein IQ-DOMAIN 1 isoform X1
OG0001568	uncharacterized protein LOC106780771 isoform X1
OG0001570	ABC transporter C family member 4-like
OG0001572	putative calcium-transporting ATPase 13, plasma membrane-type
OG0001575	putative serine/threonine-protein kinase-like protein CCR3
OG0001576	AT-hook motif nuclear-localized protein 9
OG0001577	uncharacterized protein HKW66_Vig0015130
OG0001583	proline-rich extensin-like protein EPR1
OG0001591	extensin-2
OG0001596	dihydrolipoyllysine-residue acetyltransferase component 2 of pyruvate dehydrogenase complex, mitochondrial-like isoform X2
OG0001604	uncharacterized protein LOC106762804 isoform X3
OG0001607	ribonucleases P/MRP protein subunit POP1
OG0001613	bZIP transcription factor TGA10 isoform X1
OG0001615	protein LOL1 isoform X2
OG0001617	Protein dehydration-induced 19
OG0001621	branched-chain-amino-acid aminotransferase-like protein 2
OG0001624	dormancy-associated protein homolog 3 isoform X1
OG0001633	uncharacterized protein LOC106768710 isoform X1
OG0001637	protein DA1-related 2 isoform X1
OG0001638	phytochrome E isoform X5
OG0001640	uncharacterized protein LOC108344157
OG0001646	uncharacterized protein LOC106761454
OG0001662	60S ribosomal protein L38
OG0001667	peroxidase A2
OG0001669	uncharacterized protein LOC106768980 isoform X2
OG0001670	E3 ubiquitin-protein ligase RGLG4
OG0001672	uncharacterized protein HKW66_Vig0220830
OG0001675	mannose/glucose-specific lectin-like
OG0001683	syntaxin-51 isoform X2
OG0001684	transmembrane protein 56
OG0001703	THO complex subunit 4B-like isoform X2
OG0001704	probable tyrosine-protein phosphatase At1g05000 isoform X3
OG0001708	protein CHROMATIN REMODELING 20 isoform X1
OG0001717	centromere-associated protein E isoform X2
OG0001718	uncharacterized protein LOC106778133
OG0001728	probable protein phosphatase 2C 40
OG0001730	nuclear pore complex protein NUP1 isoform X1
OG0001731	calmodulin-binding transcription activator 5
OG0001733	protein ACCELERATED CELL DEATH 6
OG0001737	kelch-like protein 28
OG0001738	uncharacterized protein LOC106756678 isoform X1
OG0001741	IAA-amino acid hydrolase ILR1-like 4 isoform X1
OG0001774	proline transporter 2
OG0001780	protein XRI1
OG0001784	uncharacterized protein LOC106762282 isoform X2
OG0001788	uncharacterized protein LOC106758805
OG0001792	uncharacterized protein LOC106762670 isoform X1
OG0001797	uncharacterized protein At2g33490 isoform X1
OG0001802	uncharacterized protein LOC114187314 isoform X3
OG0001811	protein trichome birefringence-like 19
OG0001820	uncharacterized protein LOC106762438
OG0001837	COP9 signalosome complex subunit 7 isoform X1
OG0001841	diacylglycerol O-acyltransferase 2D-like isoform X1
OG0001853	CBL-interacting serine/threonine-protein kinase 2
OG0001855	uncharacterized protein LOC106768961 isoform X2
OG0001856	uncharacterized protein LOC106762367
OG0001876	histidine-containing phosphotransfer protein 4
OG0001900	formate dehydrogenase, mitochondrial isoform X2
OG0001907	RNA polymerase beta'' subunit
OG0001916	clathrin heavy chain 1
OG0001927	putative pentatricopeptide repeat-containing protein At5g43820
OG0001968	uncharacterized protein LOC106771884 isoform X5
OG0001983	calcineurin B-like protein 10
OG0001984	neutral ceramidase 1
OG0001987	ABC transporter B family member 26, chloroplastic isoform X2
OG0001988	protein MLN51 homolog
OG0001989	probable hydroxyacylglutathione hydrolase 2, chloroplastic isoform X1
OG0001998	uncharacterized protein HKW66_Vig0064400
OG0002006	Phytosulfokines protein
OG0002007	uncharacterized protein LOC106755321
OG0002028	protein REVEILLE 6
OG0002030	pentatricopeptide repeat-containing protein At1g66345, mitochondrial-like
OG0002038	transcription factor PIF4
OG0002047	transmembrane protein 56-B
OG0002050	protein YIF1B-A
OG0002084	mitochondrial inner membrane protease ATP23 isoform X1
OG0002085	regulation of nuclear pre-mRNA domain-containing protein 1A
OG0002087	probable protein phosphatase 2C 34
OG0002103	aspartic proteinase Asp1
OG0002106	protein ROOT PRIMORDIUM DEFECTIVE 1 isoform X3
OG0002120	protein-tyrosine-phosphatase MKP1-like
OG0002121	cold-responsive protein kinase 1
OG0002124	protein TIFY 6B
OG0002130	Transposon Ty3-I Gag-Pol polyprotein
OG0002141	PLASMODESMATA CALLOSE-BINDING PROTEIN 5
OG0002162	protein CHUP1, chloroplastic isoform X2
OG0002172	F-box only protein 13
OG0002185	protein INVOLVED IN DE NOVO 2
OG0002189	dihydroorotase, mitochondrial
OG0002194	probable mediator of RNA polymerase II transcription subunit 26c isoform X2
OG0002197	clp protease proteolytic subunit
OG0002211	protein RBL isoform X4
OG0002214	protein fluG isoform X1
OG0002217	protein SPA1-RELATED 2 isoform X2
OG0002223	chorismate mutase 2
OG0002241	polyphenol oxidase, chloroplastic-like, partial
OG0002315	probable helicase MAGATAMA 3 isoform X1
OG0002316	uncharacterized protein LOC106763974 isoform X1
OG0002347	serine/threonine-protein kinase CTR1 isoform X2
OG0002354	RNA polymerase sigma factor sigF, chloroplastic isoform X4
OG0002355	cryptochrome-1 isoform X1
OG0002385	uncharacterized protein LOC106756316 isoform X1
OG0002388	Fanconi-associated nuclease 1-like protein
OG0002393	uncharacterized protein At4g19900
OG0002396	protein YLS3
OG0002400	acyltransferase-like protein At3g26840, chloroplastic
OG0002401	protein ANTHESIS POMOTING FACTOR 1-like
OG0002418	putative pentatricopeptide repeat-containing protein At1g53330
OG0002425	uncharacterized protein LOC106754119 isoform X3
OG0002426	uncharacterized protein LOC106758727 isoform X2
OG0002428	allantoinase-like
OG0002434	protein REVEILLE 2
OG0002435	DDT domain-containing protein DDB_G0282237 isoform X2
OG0002445	probable copper-transporting ATPase HMA5
OG0002452	pre-mRNA-splicing factor SLU7-A isoform X1
OG0002455	protein S-acyltransferase 8 isoform X1
OG0002469	transcription factor MYB26
OG0002476	putative E3 ubiquitin-protein ligase LIN isoform X1
OG0002489	cyclin-P3-1
OG0002490	phosphatidylinositol 4-phosphate 5-kinase 9
OG0002492	guanylate kinase 2
OG0002496	glycine-rich domain-containing protein 2
OG0002501	peamaclein
OG0002503	RHOMBOID-like protein 1
OG0002568	uncharacterized protein At1g65710
OG0002592	WEB family protein At5g55860
OG0002609	MORC family CW-type zinc finger protein 3 isoform X5
OG0002635	uncharacterized protein LOC106775179
OG0002652	signal peptide peptidase-like 2
OG0002654	oligouridylate-binding protein 1B isoform X1
OG0002655	uncharacterized protein LOC106759368 isoform X1
OG0002658	protein STICHEL-like 2
OG0002684	protein DETOXIFICATION 9-like
OG0002686	katanin p80 WD40 repeat-containing subunit B1 homolog
OG0002696	squamous cell carcinoma antigen recognized by T-cells 3 isoform X3
OG0002698	serine/threonine-protein kinase CTR1-like
OG0002712	probable amino-acid acetyltransferase NAGS1, chloroplastic isoform X2
OG0002714	receptor-like serine/threonine-protein kinase At2g45590
OG0002715	uncharacterized protein LOC106774180 isoform X1
OG0002716	probable histone-arginine methyltransferase 1.3 isoform X1
OG0002725	uncharacterized protein LOC106771937
OG0002732	uncharacterized protein LOC108339168 isoform X1
OG0002739	folate transporter 1, chloroplastic isoform X2
OG0002750	double-stranded RNA-binding protein 7
OG0002775	E3 ubiquitin-protein ligase UPL6
OG0002796	uncharacterized protein LOC106775409
OG0002803	beta-1,3-galactosyltransferase 7 isoform X1
OG0002804	amino acid transporter AVT1I-like
OG0002834	putative acyl-activating enzyme 19 isoform X4
OG0002838	uncharacterized protein LOC106754013
OG0002883	uncharacterized protein LOC106769883
OG0002886	pentatricopeptide repeat-containing protein At2g15690, mitochondrial
OG0002918	probable protein phosphatase 2C 65
OG0002937	Ribosomal protein L46
OG0002949	formin-like protein 14 isoform X1
OG0002969	BTB/POZ domain-containing protein At1g50280
OG0002996	phosphatidylinositol N-acetylglucosaminyltransferase subunit GPI1 isoform X1
OG0003008	mitochondrial metalloendopeptidase OMA1 isoform X1
OG0003012	glutelin type-D 1
OG0003017	serine decarboxylase
OG0003029	CDP-diacylglycerol--glycerol-3-phosphate 3-phosphatidyltransferase 2
OG0003053	wall-associated receptor kinase-like 14
OG0003058	uncharacterized protein LOC106757625
OG0003077	filament-like plant protein
OG0003106	serine carboxypeptidase-like 34
OG0003107	myosin-2 isoform X2
OG0003118	UDP-glucuronate:xylan alpha-glucuronosyltransferase 2
OG0003127	pumilio homolog 2
OG0003128	ferrochelatase-2, chloroplastic
OG0003145	AP-1 complex subunit sigma-1
OG0003165	transcription initiation factor TFIID subunit 1 isoform X1
OG0003166	uncharacterized protein LOC106774596
OG0003171	bark storage protein A
OG0003172	alpha-N-acetylglucosaminidase
OG0003196	hypothetical protein DPMN_040780
OG0003228	probable inactive purple acid phosphatase 29
OG0003251	protein NRT1/ PTR FAMILY 4.5-like
OG0003292	nuclear intron maturase 3, mitochondrial
OG0003304	protein ACTIVITY OF BC1 COMPLEX KINASE 7, chloroplastic
OG0003337	hypothetical protein VIGAN_01339800
OG0003377	cysteine proteinase inhibitor-like
OG0003386	probable acyl-activating enzyme 16, chloroplastic isoform X1
OG0003398	lisH domain and HEAT repeat-containing protein KIAA1468 homolog
OG0003431	protein SINE1
OG0003433	DNA-directed RNA polymerases I and III subunit RPAC2
OG0003477	54S ribosomal protein L51, mitochondrial
OG0003478	solute carrier family 40 member 2
OG0003480	protein MON2 homolog isoform X2
OG0003535	probable 3-deoxy-D-manno-octulosonic acid transferase, mitochondrial isoform X1
OG0003567	protein POLLEN DEFECTIVE IN GUIDANCE 1
OG0003605	dihydrofolate synthetase
OG0003609	probable serine/threonine-protein kinase mps1 isoform X2
OG0003624	heat shock factor-binding protein 1 isoform X1
OG0003632	GATA transcription factor 7
OG0003691	DNA-directed RNA polymerase I subunit RPA12-like isoform X2
OG0003698	uncharacterized protein LOC106762530 isoform X2
OG0003704	zinc finger CCCH domain-containing protein 43
OG0003728	RNA-binding protein 24 isoform X1
OG0003739	probable E3 ubiquitin-protein ligase ARI7
OG0003744	kinesin-like protein KIN-7O isoform X3
OG0003745	purple acid phosphatase 15
OG0003750	uncharacterized protein LOC106768157
OG0003760	uncharacterized protein At4g17910-like isoform X2
OG0003780	uncharacterized protein LOC106768096
OG0003822	pre-mRNA-splicing factor ISY1 homolog
OG0003826	F-box protein PP2-A15 isoform X1
OG0003897	ribosomal RNA processing protein 36 homolog
OG0003933	uncharacterized protein LOC106753508
OG0003947	protein EXPORTIN 1A
OG0003961	nucleolar transcription factor 1-A
OG0004008	ATP-dependent DNA helicase Q-like SIM isoform X5
OG0004098	E3 ubiquitin-protein ligase CHIP isoform X1
OG0004104	omega-hydroxypalmitate O-feruloyl transferase
OG0004167	uncharacterized protein LOC106752548 isoform X4
OG0004171	argininosuccinate synthase, chloroplastic isoform X1
OG0004181	cytochrome P450 87A3
OG0004195	uncharacterized protein LOC106779621
OG0004233	DExH-box ATP-dependent RNA helicase DExH17
OG0004269	oil body-associated protein 2B-like
OG0004318	guanylate kinase 2, chloroplastic/mitochondrial-like
OG0004336	uncharacterized protein LOC106764272 isoform X2
OG0004344	putative F-box protein At3g17490
OG0004363	tRNA-splicing endonuclease subunit Sen2-1
OG0004380	F-box protein SKIP24
OG0004512	phosphoinositide phosphatase SAC1
OG0004547	BON1-associated protein 2-like
OG0004580	uncharacterized protein LOC108325688
OG0004584	F-box/kelch-repeat protein At5g42350
OG0004646	beta carbonic anhydrase 5, chloroplastic isoform X1
OG0004704	E3 ubiquitin-protein ligase PRT6 isoform X2
OG0004726	protein ABA DEFICIENT 4, chloroplastic
OG0004728	tryptophan aminotransferase-related protein 4-like
OG0004736	LOW QUALITY PROTEIN: midasin-like
OG0004766	5'-methylthioadenosine/S-adenosylhomocysteine nucleosidase 2
OG0004803	probable lipid-A-disaccharide synthase, mitochondrial isoform X1
OG0004805	LOW QUALITY PROTEIN: uncharacterized protein LOC109793906
OG0004807	pentatricopeptide repeat-containing protein At2g16880-like
OG0004817	uncharacterized protein LOC106758629 isoform X1
OG0004827	50S ribosomal protein 5, chloroplastic
OG0005072	pentatricopeptide repeat-containing protein At1g09820 isoform X2
OG0005077	uncharacterized protein LOC106768198
OG0005138	protection of telomeres protein 1b isoform X1
OG0005174	uncharacterized protein LOC106753282
OG0005204	isoflavone reductase
OG0005245	thaumatin-like protein 1b
OG0005426	pentatricopeptide repeat-containing protein At4g25270, chloroplastic-like
OG0005479	type 1 phosphatases regulator ypi1
OG0005494	putative ubiquitin-conjugating enzyme E2 38
OG0005551	uncharacterized protein LOC106772348 isoform X1
OG0005654	uncharacterized protein LOC106760928
OG0005670	PLASMODESMATA CALLOSE-BINDING PROTEIN 5-like
OG0005682	AUGMIN subunit 3 isoform X2
OG0005815	transcription factor bHLH143-like
OG0005910	probable serine/threonine protein kinase IREH1 isoform X1
OG0005921	LOW QUALITY PROTEIN: uncharacterized protein LOC106773718
OG0005961	dnaJ homolog subfamily C member 2
OG0005985	sialyltransferase-like protein 1 isoform X2
OG0005987	chaperone protein ClpB1
OG0006016	VHS domain-containing protein At3g16270 isoform X2
OG0006034	F-box protein At4g35930
OG0006055	protein DOG1-like 4
OG0006130	uncharacterized protein LOC106768713
OG0006131	pentatricopeptide repeat-containing protein At4g20770 isoform X1
OG0006214	uncharacterized protein LOC106778462
OG0006301	SMR domain-containing protein At5g58720 isoform X2
OG0006331	uncharacterized protein LOC106759585
OG0006346	hypothetical protein VIGAN_08206300
OG0006361	peptidyl-prolyl cis-trans isomerase CYP59 isoform X2
OG0006413	uncharacterized protein LOC111241895
OG0006457	zinc finger MYND domain-containing protein 15-like isoform X1
OG0006532	pentatricopeptide repeat-containing protein At5g47360-like isoform X1
OG0006534	uncharacterized protein LOC124842310
OG0006541	thioredoxin-like protein AAED1, chloroplastic
OG0006659	nuclear pore complex protein NUP214 isoform X2
OG0006734	translation initiation factor IF3-1, mitochondrial isoform X1
OG0006747	pentatricopeptide repeat-containing protein At2g17140
OG0006802	cleavage stimulation factor subunit 77 isoform X2
OG0006815	pentatricopeptide repeat-containing protein At1g74900, mitochondrial
OG0006965	protein SCAR1 isoform X3
OG0007115	probable serine/threonine-protein kinase At1g54610
OG0007170	ultraviolet-B receptor UVR8 isoform X1
OG0007186	caffeoylshikimate esterase
OG0007365	uncharacterized protein LOC106776266 isoform X1
OG0007613	nucleolin
OG0007770	uncharacterized protein LOC124826240 isoform X1
OG0007930	uncharacterized protein LOC106765566
OG0008142	uncharacterized protein LOC106769940
OG0009040	importin subunit alpha-9 isoform X1
OG0009710	uncharacterized protein LOC106758807
OG0010230	pentatricopeptide repeat-containing protein At1g09900-like
OG0010783	NADH dehydrogenase subunit 1
OG0010872	uncharacterized protein LOC108335326
OG0012860	plasma membrane ATPase 2-like
OG0013941	uncharacterized protein LOC111242640
OG0014315	hypothetical protein VIGAN_06144200
OG0015381	uncharacterized protein LOC111240910
OG0015914	hypothetical protein VIGAN_08013600
OG0015999	hypothetical protein L6164_030920
OG0016504	serine hydroxymethyltransferase, partial
